# Supplementary material
Source: PubMed Central journal article supplement (PMC8156739)
Supplement: NIHMS1703969-supplement-Supplementary_data.pdf [file NIHMS1703969-supplement-Supplementary_data.pdf]

## Supporting Figures

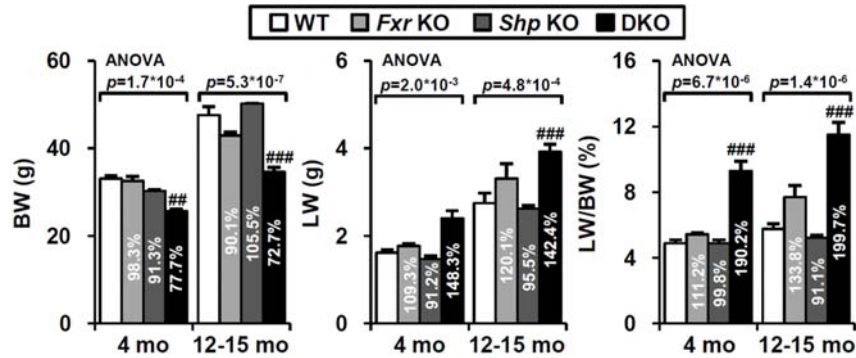

**Supporting Fig. S1. Significant body weight changes in aged DKO mice.** (A) Body weight, (B) liver weight and (C) liver/body weight ratio of *Fxr* single knockout, *Shp* single knockout and DKO were calculated at 4 month and 12-15 month old age (n=3~10). Numerical values in bar graphs indicate relative percentage compared to WT (%). One-way ANOVA followed by post hoc t-test. ###p<0.0017, ####p<0.00083 compared to WT.

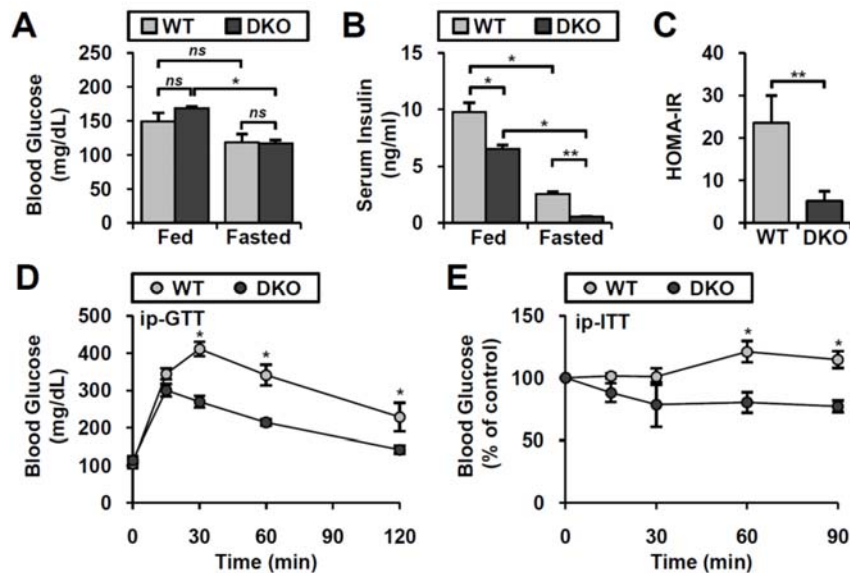

**Supporting Fig. S2. Improved glucose metabolism in DKO mice.** Feeding and fasting (A) blood glucose and (B) serum insulin levels of 1 year old DKO were measured (n=2~3). (C) HOMA-IR index of DKO mice. (D) GTT and (E) ITT of DKO mice at 1 year old age

(n=2~3). *ns*, not significant. Student's t-test, \* $p < 0.05$ , \*\* $p < 0.01$ .

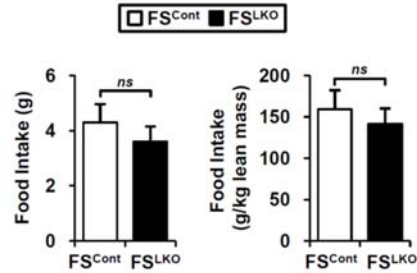

**Supporting Fig. S3. Unchanged food intake in FSLKO mice.** Daily food intake was measured (n=3). In the right panel, the absolute amount from the left panel was normalized to lean mass. *ns*, not significant.

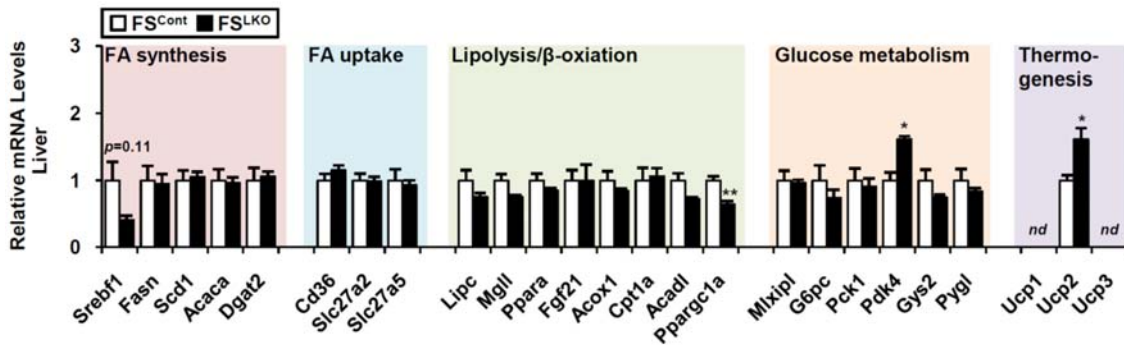

**Supporting Fig. S4. Hepatic fatty acid/glucose metabolism gene expressions in FSLKO.** Gene expression involved in fatty acid synthesis, fatty acid uptake, lipolysis, β-oxidation, glucose metabolism and thermogenesis were analyzed by qPCR (n=4). *nd*, not detected. Student's t-test, \* $p < 0.05$ , \*\* $p < 0.01$ .

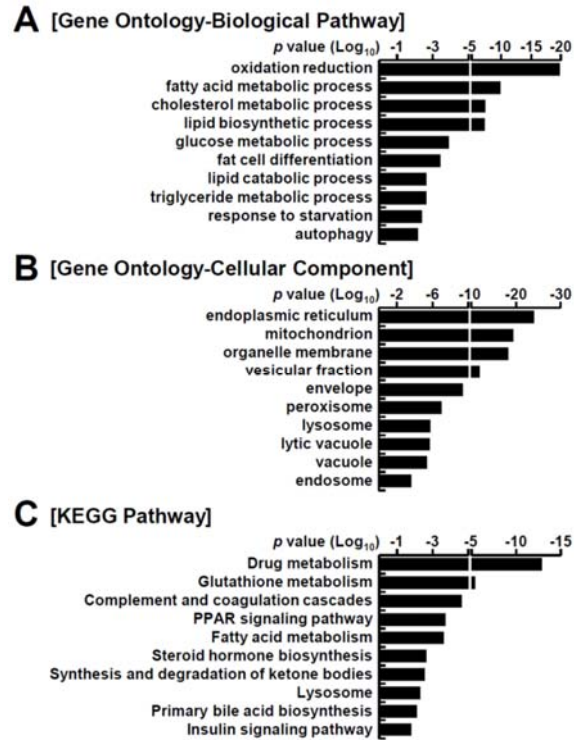

**Supporting Fig. S5. Gene ontology and KEGG pathway analysis of altered gene lists in DKO microarray.** Genes showing differential expression in DKO microarray ( $p < 0.01$ ) were analyzed using DAVID Tools. Initially, 192 biological pathways (GO-BP), 62 cellular components (GO-CC) and 20 KEGG pathways were identified ( $p < 0.01$ ) (Supporting Table S3-5). Then, these gene sets were further classified into several functional/locational categories and representative results are shown in (A) biological pathway, (B) cellular component and (C) KEGG pathway.

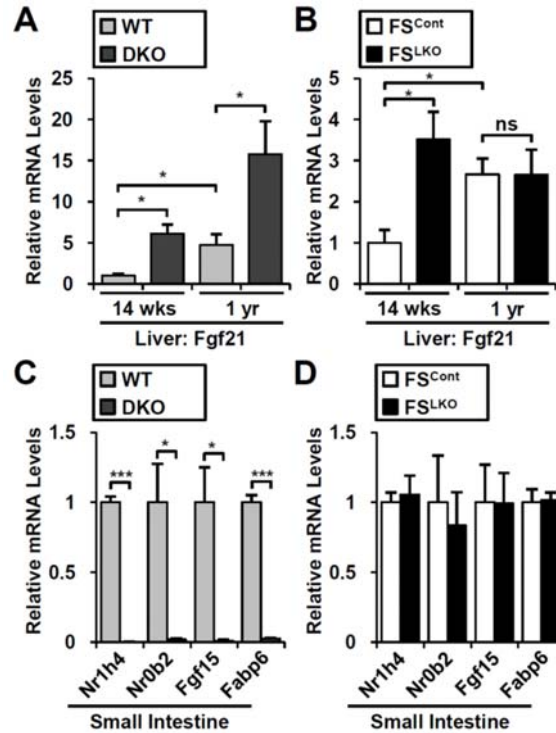

**Supporting Fig. S6. The hepatic *Fgf21* and intestinal *Fgf15* expression in DKO and FS<sup>LKO</sup> liver.** Hepatic *Fgf21* expression was determined by Q-PCR in (A) DKO and (B) FS<sup>LKO</sup> mice at 14 weeks and 1 yr old age. The intestinal *Fgf15* expression was analyzed in ileum of (C) DKO and (D) FS<sup>LKO</sup> mice at 14 weeks old age.

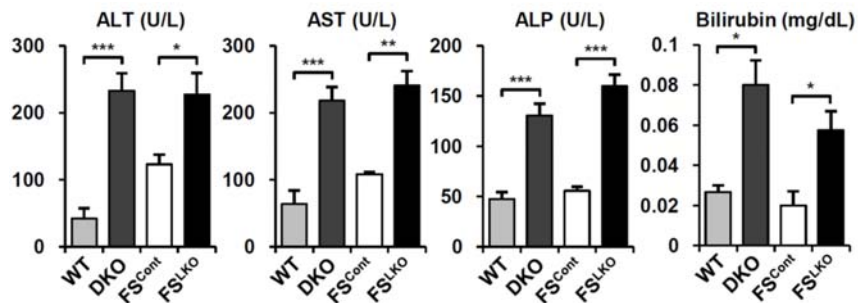

**Supporting Fig. S7. Liver injury in aged DKO and FS<sup>LKO</sup> mice.** Serum ALT, AST, ALP and bilirubin levels were analyzed in 1 year old DKO and FS<sup>LKO</sup> mice.

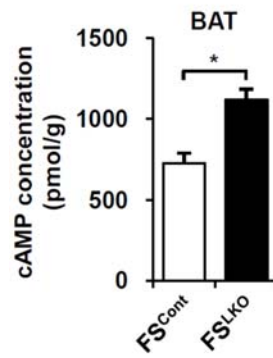

**Supporting Fig. S8. Increased cAMP levels in F5<sup>LKO</sup> BAT.** cAMP level was measured in BAT extract according to the manufacturer's protocol (Direct cAMP ELISA Kit, ENZO Life Sciences, #ADI-900-066).

## Supporting tables

**Supporting Table S1. Primer sequences used for Q-PCR**

| <b>Gene Symbol</b> | <b>Forward primer</b>   | <b>Reverse primer</b>   |
|--------------------|-------------------------|-------------------------|
| Abcb11 (Bsep)      | GCTGCCAAGGATGCTAATGC    | CTACCCTTGCTTCTGCCCA     |
| Acaca              | CATGCGATCTATCCGTCGGT    | CCTCCAGGCACTGGAACATAG   |
| Acadl              | GCGATTTCTGCCTGTGAGTTC   | ACCGTCTGTATGTGTGCAACT   |
| Acox1              | GAGCCTTTGGACCTTCACTTGG  | CGCATAAGTGCCCGTGATCT    |
| Acs11              | ACCAGCCCTATGAGTGGATTT   | CAAGGCTTGAACCCCTTCTG    |
| Acs14              | TCCTCCAAGTAGACCAACCCC   | AGTCCAGGGATACGTTACACAC  |
| Agpat9             | CGGATTATCCCTGGGTATCTCG  | CGAAGTCCCTTCCCTCGAAGAC  |
| Atg7               | TGCCTATGATGATCTGTGTC    | CACCAACTGTTATCTTTGTCC   |
| Atg12              | GGCCTCGGAACAGTTGTTTA    | CAGCACCGAAATGTCTCTGA    |
| Atg16l1            | CGAATCTGGACTGTGGATGA    | AGCAGGAACTTGGCAGAGAG    |
| Dgat2              | AGTGGCAATGCTATCATCATCGT | AAGGAATAAGTGGGAACCAGA   |
| Dio2               | AGGATGCACACGGAAAGGAG    | ACCTATCTTTGCCATCGCCC    |
| Cd36               | GCCAAGCTATTGCGACATGAT   | CAGATCCGAACACAGCGTAGA   |
| Cidea              | CATACATCCAGCTCGCCCTT    | CGTAACCAGGCCAGTTGTGA    |
| Cpt1a              | GGACTCCGCTCGCTCATTC     | GAGATCGATGCCATCAGGGG    |
| Ctsd               | CTGGCTCCTCTAACCTGTGG    | GACGTGCCGTTCTTACATA     |
| Elovl1             | CCGGCCCTGATCCCTTTG      | AGCTCGTGGTACAAGTTCACA   |
| Elovl2             | TACCCTGGACAGCGCATCG     | CACCCGCGAACTCGAGAAT     |
| Elovl3             | GAGGCACACACAAACACTCAAT  | AGGACTTGTTCCTACTGTTCTT  |
| Elovl5             | GCAGCTTGCTTCTGTTCCCG    | GAGTGACGCATCGAAATGTTCC  |
| Elovl6             | CCTTCTGGGTGAGGACTCG     | CCGTCCACTAATCTCTGCC     |
| Fabp6 (IBabp)      | CAAGGCTACCGTGAAGATGGA   | CTTACGCGCTCATAGGTCACA   |
| Fads1              | AGCACATGCCATACAACCATC   | TTTCCGCTGAACCACAAAATAGA |
| Fads2              | GATGGCTGCAACATGACTATGG  | GCTGAGGCACCCTTAAGTGG    |
| Fasn               | AAGCAGGCACACACAATGGA    | AGTGTTCGTTCCCTCGGAGTG   |
| Fgf21              | ATCAGGGAGGATGGAACAGTGG  | AGCTCCATCTGGCTGTTGGCAA  |
| Fgf15              | AGGAGGACCAAAAACGAACGAA  | GAGTAGCGAATCAGCCCCTAT   |
| G6pc               | TGCTGTGTCTGGTAGGCAAC    | AACATCGGAGTGACCTTTGG    |
| Gapdh              | CTTTGGCATTGTGGAAGGGC    | CAGGGATGATGTTCTGGGCA    |
| Gpat4              | AAAAGCAAGCTGCCCATCCT    | AGAAGGCGTCACCAAACCTGA   |
| Gys2               | GCAGTGATGCGGAAGACGAA    | AGTGGTTCAGAGAAAACGGTGA  |
| Lipe (Hsl)         | AATGAGATGGCGAGGGTCCAG   | GCCCTCACAGCAGGAATAGT    |
| Lipc               | TGAGGCCAGAGACATGGG      | CAAGGCTTCTCCCAAAGGGC    |
| Mgl1               | CGCGCAGTAGTCTGGCTCTA    | ATTCTGTGGAGTTCGCCTGG    |
| Mlxipl (Chrebp)    | AGAAGAGATCAGGGCAAGGG    | CCAACCCTGCAGACAGTTTT    |
| Nr1h4 (Fxr)        | TCCGGACATTCAACCATCAC    | TCACTGCACATCCCAGATCTC   |
| Nr0b2 (Shp)        | CGATCCTCTTCAACCCAGATG   | AGGGCTCCAAGACTTCACACA   |
| Pdk4               | AGATTGACATCCTGCCTGACC   | TCTGGTCTTCTGGGCTCTTCT   |
| Pck1               | TGCGGATCATGACTCGGATG    | AGGCCAGTTGTTGACAAA      |
| Pnpla2 (Atgl)      | CCTTAGGAGGAATGCCCTGC    | CTCCAGCGGCAGAGTATAGG    |
| Ppara              | ACAAGGCCTCAGGTTACCA     | GCCGAAAGAAGCCCTTACAG    |
| Ppargc1a           | ATGTGTCGCCTTCTTGTCT     | ATCTACTGCCTGGGGACCTT    |
| Prdm16             | GGAGGAGGAGAGAGATTCCG    | AGGTCCGGGTCAGGTTACATAC  |
| Pygl               | GCATGGAAACCCTTGGGAGA    | CGTCTGGGTGTGCTCTACTC    |
| Scd1               | GCGATACTACTCTGGTGTCTCA  | CCCAGGGAAACCAGGATATT    |
| Scd2               | TGGAGACGGAAGCTGCAAGA    | AACAGTAAGCCTCTGCCAAGC   |
| Slc27a2 (Fatp2)    | ATCGTGGTTGGGGCTACTTTAG  | TTTGGTTTCTGCGGTGTGTTG   |

|                 |                       |                       |
|-----------------|-----------------------|-----------------------|
| Slc27a5 (Fatp5) | GAGGGCAATGTGGGCTTAATG | AGGCTCTGCTGTCTCTATGTC |
| Srebf1          | GGGCAAGTACACAGGAGGAC  | AGATCTCTGCCAGTGTGTC   |
| Sqstm1          | AGGAACAGATGGAGTCGGGA  | CTAGAGAGCTTGCCCTTCC   |
| Ucp1            | GGATGGTGAACCCGACAAC   | GCTGAAACTCCGGCTGAGAA  |
| Ucp2            | TCTGCACTCCTGTGTTCTCT  | TAGAAAATGGCTGGGAGACGA |
| Ucp3            | GACTCCGCCCTCTGTAATG   | CAGATCACGCTCCATCCTCC  |

### Supporting Table S2. Primer sequences used for ChIP-PCR

| Gene Symbol | Forward primer         | Reverse primer           |
|-------------|------------------------|--------------------------|
| Atg7_1 ChIP | AGTTGAGCGGCGGTAAGTAA   | GAGTACGAGGGGACCCGAGTA    |
| Atg7_2 ChIP | TCATCTGCCTGGAACATCTGTC | TGAACCTTGATCCTGTGGTTTTGT |
| Atg12 ChIP  | GGAGGTGGGACTGGGATTAAC  | ATAGCGCTCCATACTCGGTT     |

### Supporting Table S3. DAVID Analysis of Gene Ontology (Biological Pathways)

| Category      | Term                                                                                                                      | RT | Count | %   | P-Value  | Benjamini |
|---------------|---------------------------------------------------------------------------------------------------------------------------|----|-------|-----|----------|-----------|
| GOTERM_BP_FAT | oxidation reduction                                                                                                       | RT | 182   | 6.9 | 1.60E-20 | 6.10E-17  |
| GOTERM_BP_FAT | fatty acid metabolic process                                                                                              | RT | 60    | 2.3 | 1.50E-10 | 2.90E-07  |
| GOTERM_BP_FAT | cofactor metabolic process                                                                                                | RT | 58    | 2.2 | 8.30E-10 | 1.10E-06  |
| GOTERM_BP_FAT | sterol metabolic process                                                                                                  | RT | 33    | 1.2 | 2.00E-09 | 1.90E-06  |
| GOTERM_BP_FAT | steroid metabolic process                                                                                                 | RT | 52    | 2   | 4.10E-09 | 3.20E-06  |
| GOTERM_BP_FAT | coenzyme metabolic process                                                                                                | RT | 48    | 1.8 | 4.40E-09 | 2.90E-06  |
| GOTERM_BP_FAT | cholesterol metabolic process                                                                                             | RT | 29    | 1.1 | 5.50E-08 | 3.00E-05  |
| GOTERM_BP_FAT | lipid biosynthetic process                                                                                                | RT | 74    | 2.8 | 6.70E-08 | 3.30E-05  |
| GOTERM_BP_FAT | adaptive immune response based on somatic recombination of immune receptors built from immunoglobulin superfamily domains | RT | 32    | 1.2 | 9.80E-08 | 4.20E-05  |
| GOTERM_BP_FAT | adaptive immune response                                                                                                  | RT | 32    | 1.2 | 9.80E-08 | 4.20E-05  |
| GOTERM_BP_FAT | secondary metabolic process                                                                                               | RT | 28    | 1.1 | 1.60E-07 | 6.20E-05  |
| GOTERM_BP_FAT | organic acid biosynthetic process                                                                                         | RT | 43    | 1.6 | 6.20E-07 | 2.80E-04  |
| GOTERM_BP_FAT | carboxylic acid biosynthetic process                                                                                      | RT | 43    | 1.6 | 6.20E-07 | 2.20E-04  |
| GOTERM_BP_FAT | vitamin metabolic process                                                                                                 | RT | 27    | 1   | 6.50E-07 | 2.10E-04  |
| GOTERM_BP_FAT | monosaccharide metabolic process                                                                                          | RT | 53    | 2   | 7.10E-07 | 2.10E-04  |
| GOTERM_BP_FAT | heterocycle catabolic process                                                                                             | RT | 21    | 0.8 | 8.90E-07 | 2.50E-04  |
| GOTERM_BP_FAT | response to wounding                                                                                                      | RT | 82    | 3.1 | 9.00E-07 | 2.30E-04  |
| GOTERM_BP_FAT | steroid biosynthetic process                                                                                              | RT | 27    | 1   | 1.20E-06 | 3.00E-04  |
| GOTERM_BP_FAT | hexose metabolic process                                                                                                  | RT | 48    | 1.8 | 1.20E-06 | 2.80E-04  |
| GOTERM_BP_FAT | lymphocyte mediated immunity                                                                                              | RT | 28    | 1.1 | 1.50E-06 | 3.30E-04  |
| GOTERM_BP_FAT | regulation of cell adhesion                                                                                               | RT | 32    | 1.2 | 1.70E-06 | 3.40E-04  |
| GOTERM_BP_FAT | acute inflammatory response                                                                                               | RT | 29    | 1.1 | 1.90E-06 | 3.60E-04  |
| GOTERM_BP_FAT | cellular amino acid biosynthetic process                                                                                  | RT | 20    | 0.8 | 1.90E-06 | 3.50E-04  |
| GOTERM_BP_FAT | sterol biosynthetic process                                                                                               | RT | 16    | 0.6 | 2.40E-06 | 4.30E-04  |
| GOTERM_BP_FAT | isoprenoid metabolic process                                                                                              | RT | 21    | 0.8 | 3.00E-06 | 5.00E-04  |
| GOTERM_BP_FAT | positive regulation of immune system process                                                                              | RT | 54    | 2   | 3.60E-06 | 5.80E-04  |
| GOTERM_BP_FAT | diterpenoid metabolic process                                                                                             | RT | 15    | 0.6 | 5.30E-06 | 8.20E-04  |
| GOTERM_BP_FAT | retinoid metabolic process                                                                                                | RT | 15    | 0.6 | 5.30E-06 | 8.20E-04  |
| GOTERM_BP_FAT | vitamin biosynthetic process                                                                                              | RT | 15    | 0.6 | 8.90E-06 | 1.30E-03  |
| GOTERM_BP_FAT | terpenoid metabolic process                                                                                               | RT | 15    | 0.6 | 8.90E-06 | 1.30E-03  |
| GOTERM_BP_FAT | protein maturation by peptide bond cleavage                                                                               | RT | 24    | 0.9 | 9.80E-06 | 1.40E-03  |
| GOTERM_BP_FAT | vitamin A metabolic process                                                                                               | RT | 14    | 0.5 | 1.20E-05 | 1.60E-03  |
| GOTERM_BP_FAT | leukocyte mediated immunity                                                                                               | RT | 29    | 1.1 | 1.50E-05 | 1.90E-03  |
| GOTERM_BP_FAT | fat-soluble vitamin metabolic process                                                                                     | RT | 16    | 0.6 | 1.70E-05 | 2.20E-03  |
| GOTERM_BP_FAT | retinoic acid metabolic process                                                                                           | RT | 11    | 0.4 | 1.90E-05 | 2.40E-03  |
| GOTERM_BP_FAT | immunoglobulin mediated immune response                                                                                   | RT | 23    | 0.9 | 1.90E-05 | 2.30E-03  |
| GOTERM_BP_FAT | positive regulation of immune response                                                                                    | RT | 38    | 1.4 | 2.80E-05 | 3.20E-03  |
| GOTERM_BP_FAT | antigen processing and presentation of exogenous antigen                                                                  | RT | 14    | 0.5 | 3.20E-05 | 3.60E-03  |
| GOTERM_BP_FAT | B cell mediated immunity                                                                                                  | RT | 23    | 0.9 | 3.40E-05 | 3.70E-03  |
| GOTERM_BP_FAT | activation of plasma proteins involved in acute inflammatory response                                                     | RT | 16    | 0.6 | 3.80E-05 | 4.10E-03  |
| GOTERM_BP_FAT | complement activation                                                                                                     | RT | 16    | 0.6 | 3.80E-05 | 4.10E-03  |
| GOTERM_BP_FAT | hexose biosynthetic process                                                                                               | RT | 13    | 0.5 | 4.20E-05 | 4.40E-03  |
| GOTERM_BP_FAT | inflammatory response                                                                                                     | RT | 54    | 2   | 5.20E-05 | 5.20E-03  |
| GOTERM_BP_FAT | organic acid catabolic process                                                                                            | RT | 26    | 1   | 5.90E-05 | 5.80E-03  |
| GOTERM_BP_FAT | carboxylic acid catabolic process                                                                                         | RT | 26    | 1   | 5.90E-05 | 5.80E-03  |

|               |                                                                       |    |     |     |          |          |
|---------------|-----------------------------------------------------------------------|----|-----|-----|----------|----------|
| GOTERM_BP_FAT | activation of immune response                                         | RT | 27  | 1   | 6.20E-05 | 6.00E-03 |
| GOTERM_BP_FAT | cellular amino acid derivative metabolic process                      | RT | 38  | 1.4 | 6.50E-05 | 6.10E-03 |
| GOTERM_BP_FAT | protein maturation                                                    | RT | 29  | 1.1 | 6.80E-05 | 6.20E-03 |
| GOTERM_BP_FAT | complement activation, classical pathway                              | RT | 14  | 0.5 | 7.70E-05 | 6.90E-03 |
| GOTERM_BP_FAT | nitrogen compound catabolic process                                   | RT | 17  | 0.6 | 7.90E-05 | 6.90E-03 |
| GOTERM_BP_FAT | amine biosynthetic process                                            | RT | 24  | 0.9 | 8.10E-05 | 6.90E-03 |
| GOTERM_BP_FAT | nitrogen compound biosynthetic process                                | RT | 67  | 2.5 | 8.10E-05 | 6.80E-03 |
| GOTERM_BP_FAT | intracellular transport                                               | RT | 89  | 3.4 | 8.30E-05 | 6.80E-03 |
| GOTERM_BP_FAT | cholesterol biosynthetic process                                      | RT | 12  | 0.5 | 9.30E-05 | 7.50E-03 |
| GOTERM_BP_FAT | amine catabolic process                                               | RT | 22  | 0.8 | 1.10E-04 | 8.50E-03 |
| GOTERM_BP_FAT | monosaccharide biosynthetic process                                   | RT | 14  | 0.5 | 1.20E-04 | 9.00E-03 |
| GOTERM_BP_FAT | humoral immune response mediated by circulating immunoglobulin        | RT | 15  | 0.6 | 1.20E-04 | 8.90E-03 |
| GOTERM_BP_FAT | glucose metabolic process                                             | RT | 37  | 1.4 | 1.30E-04 | 9.30E-03 |
| GOTERM_BP_FAT | protein processing                                                    | RT | 27  | 1   | 1.40E-04 | 1.00E-02 |
| GOTERM_BP_FAT | immune effector process                                               | RT | 34  | 1.3 | 1.60E-04 | 1.20E-02 |
| GOTERM_BP_FAT | cellular response to nutrient levels                                  | RT | 13  | 0.5 | 1.70E-04 | 1.20E-02 |
| GOTERM_BP_FAT | pyridine nucleotide metabolic process                                 | RT | 13  | 0.5 | 1.70E-04 | 1.20E-02 |
| GOTERM_BP_FAT | nucleobase, nucleoside and nucleotide catabolic process               | RT | 15  | 0.6 | 1.70E-04 | 1.20E-02 |
| GOTERM_BP_FAT | nucleobase, nucleoside, nucleotide and nucleic acid catabolic process | RT | 15  | 0.6 | 1.70E-04 | 1.20E-02 |
| GOTERM_BP_FAT | positive regulation of response to stimulus                           | RT | 45  | 1.7 | 1.90E-04 | 1.30E-02 |
| GOTERM_BP_FAT | cellular response to extracellular stimulus                           | RT | 17  | 0.6 | 2.00E-04 | 1.30E-02 |
| GOTERM_BP_FAT | humoral immune response                                               | RT | 19  | 0.7 | 2.10E-04 | 1.40E-02 |
| GOTERM_BP_FAT | response to extracellular stimulus                                    | RT | 35  | 1.3 | 2.20E-04 | 1.40E-02 |
| GOTERM_BP_FAT | pyruvate metabolic process                                            | RT | 12  | 0.5 | 2.30E-04 | 1.50E-02 |
| GOTERM_BP_FAT | glycerolipid metabolic process                                        | RT | 34  | 1.3 | 2.60E-04 | 1.60E-02 |
| GOTERM_BP_FAT | cellular carbohydrate biosynthetic process                            | RT | 19  | 0.7 | 3.50E-04 | 2.20E-02 |
| GOTERM_BP_FAT | fat cell differentiation                                              | RT | 20  | 0.8 | 3.90E-04 | 2.30E-02 |
| GOTERM_BP_FAT | cellular hormone metabolic process                                    | RT | 18  | 0.7 | 4.10E-04 | 2.40E-02 |
| GOTERM_BP_FAT | establishment of protein localization                                 | RT | 122 | 4.6 | 4.20E-04 | 2.50E-02 |
| GOTERM_BP_FAT | blood vessel development                                              | RT | 54  | 2   | 4.60E-04 | 2.60E-02 |
| GOTERM_BP_FAT | protein transport                                                     | RT | 121 | 4.6 | 4.60E-04 | 2.60E-02 |
| GOTERM_BP_FAT | antigen processing and presentation of peptide antigen                | RT | 14  | 0.5 | 4.90E-04 | 2.70E-02 |
| GOTERM_BP_FAT | innate immune response                                                | RT | 29  | 1.1 | 5.00E-04 | 2.70E-02 |
| GOTERM_BP_FAT | glycerol metabolic process                                            | RT | 11  | 0.4 | 5.10E-04 | 2.70E-02 |
| GOTERM_BP_FAT | antigen processing and presentation of exogenous peptide antigen      | RT | 11  | 0.4 | 5.10E-04 | 2.70E-02 |
| GOTERM_BP_FAT | nucleotide catabolic process                                          | RT | 13  | 0.5 | 5.20E-04 | 2.70E-02 |
| GOTERM_BP_FAT | regulation of programmed cell death                                   | RT | 106 | 4   | 5.60E-04 | 2.90E-02 |
| GOTERM_BP_FAT | protein localization                                                  | RT | 136 | 5.2 | 6.60E-04 | 3.40E-02 |
| GOTERM_BP_FAT | regulation of cell death                                              | RT | 106 | 4   | 6.70E-04 | 3.40E-02 |
| GOTERM_BP_FAT | cellular amino acid catabolic process                                 | RT | 18  | 0.7 | 6.70E-04 | 3.40E-02 |
| GOTERM_BP_FAT | gluconeogenesis                                                       | RT | 10  | 0.4 | 7.20E-04 | 3.50E-02 |
| GOTERM_BP_FAT | oligosaccharide metabolic process                                     | RT | 10  | 0.4 | 7.20E-04 | 3.50E-02 |
| GOTERM_BP_FAT | regulation of coagulation                                             | RT | 10  | 0.4 | 7.20E-04 | 3.50E-02 |
| GOTERM_BP_FAT | response to hypoxia                                                   | RT | 20  | 0.8 | 7.50E-04 | 3.70E-02 |
| GOTERM_BP_FAT | regulation of apoptosis                                               | RT | 104 | 3.9 | 7.60E-04 | 3.70E-02 |
| GOTERM_BP_FAT | response to nutrient levels                                           | RT | 30  | 1.1 | 7.70E-04 | 3.70E-02 |
| GOTERM_BP_FAT | fat-soluble vitamin biosynthetic process                              | RT | 6   | 0.2 | 8.30E-04 | 3.90E-02 |
| GOTERM_BP_FAT | vasculature development                                               | RT | 54  | 2   | 8.30E-04 | 3.80E-02 |
| GOTERM_BP_FAT | negative regulation of lipid metabolic process                        | RT | 7   | 0.3 | 8.80E-04 | 4.00E-02 |
| GOTERM_BP_FAT | alcohol biosynthetic process                                          | RT | 14  | 0.5 | 9.00E-04 | 4.10E-02 |
| GOTERM_BP_FAT | response to oxygen levels                                             | RT | 20  | 0.8 | 9.30E-04 | 4.10E-02 |
| GOTERM_BP_FAT | angiogenesis                                                          | RT | 33  | 1.2 | 1.00E-03 | 4.50E-02 |
| GOTERM_BP_FAT | brown fat cell differentiation                                        | RT | 12  | 0.5 | 1.10E-03 | 4.70E-02 |
| GOTERM_BP_FAT | alditol metabolic process                                             | RT | 11  | 0.4 | 1.10E-03 | 4.80E-02 |
| GOTERM_BP_FAT | oxidoreduction coenzyme metabolic process                             | RT | 14  | 0.5 | 1.20E-03 | 5.10E-02 |
| GOTERM_BP_FAT | defense response                                                      | RT | 86  | 3.3 | 1.20E-03 | 5.20E-02 |
| GOTERM_BP_FAT | response to oxidative stress                                          | RT | 24  | 0.9 | 1.30E-03 | 5.50E-02 |
| GOTERM_BP_FAT | acylglycerol metabolic process                                        | RT | 15  | 0.6 | 1.40E-03 | 5.60E-02 |
| GOTERM_BP_FAT | organic ether metabolic process                                       | RT | 16  | 0.6 | 1.50E-03 | 6.00E-02 |
| GOTERM_BP_FAT | cellular amide metabolic process                                      | RT | 14  | 0.5 | 1.60E-03 | 6.30E-02 |
| GOTERM_BP_FAT | ribonucleoside metabolic process                                      | RT | 14  | 0.5 | 1.60E-03 | 6.30E-02 |
| GOTERM_BP_FAT | isoprenoid biosynthetic process                                       | RT | 10  | 0.4 | 1.60E-03 | 6.50E-02 |
| GOTERM_BP_FAT | response to hormone stimulus                                          | RT | 38  | 1.4 | 1.70E-03 | 6.70E-02 |
| GOTERM_BP_FAT | regulation of cell-substrate adhesion                                 | RT | 14  | 0.5 | 2.00E-03 | 7.80E-02 |
| GOTERM_BP_FAT | lipid localization                                                    | RT | 31  | 1.2 | 2.20E-03 | 8.40E-02 |
| GOTERM_BP_FAT | aromatic compound catabolic process                                   | RT | 8   | 0.3 | 2.20E-03 | 8.30E-02 |
| GOTERM_BP_FAT | glutamine family amino acid biosynthetic process                      | RT | 8   | 0.3 | 2.20E-03 | 8.30E-02 |
| GOTERM_BP_FAT | neutral lipid metabolic process                                       | RT | 15  | 0.6 | 2.20E-03 | 8.20E-02 |
| GOTERM_BP_FAT | glycerol ether metabolic process                                      | RT | 15  | 0.6 | 2.20E-03 | 8.20E-02 |
| GOTERM_BP_FAT | generation of precursor metabolites and energy                        | RT | 54  | 2   | 2.30E-03 | 8.30E-02 |
| GOTERM_BP_FAT | regulation of cell cycle                                              | RT | 46  | 1.7 | 2.30E-03 | 8.50E-02 |
| GOTERM_BP_FAT | lipid catabolic process                                               | RT | 32  | 1.2 | 2.30E-03 | 8.40E-02 |
| GOTERM_BP_FAT | triglyceride metabolic process                                        | RT | 13  | 0.5 | 2.40E-03 | 8.40E-02 |
| GOTERM_BP_FAT | alcohol catabolic process                                             | RT | 19  | 0.7 | 2.40E-03 | 8.60E-02 |
| GOTERM_BP_FAT | cellular carbohydrate catabolic process                               | RT | 18  | 0.7 | 2.40E-03 | 8.60E-02 |



|               |                                                                                   |    |     |     |          |          |
|---------------|-----------------------------------------------------------------------------------|----|-----|-----|----------|----------|
| GOTERM_BP_FAT | cellular protein localization                                                     | RT | 60  | 2.3 | 2.70E-03 | 9.20E-02 |
| GOTERM_BP_FAT | cofactor catabolic process                                                        | RT | 12  | 0.5 | 2.70E-03 | 9.20E-02 |
| GOTERM_BP_FAT | lipid transport                                                                   | RT | 29  | 1.1 | 2.90E-03 | 9.70E-02 |
| GOTERM_BP_FAT | cellular macromolecule localization                                               | RT | 60  | 2.3 | 3.10E-03 | 1.00E-01 |
| GOTERM_BP_FAT | glutathione metabolic process                                                     | RT | 10  | 0.4 | 3.30E-03 | 1.10E-01 |
| GOTERM_BP_FAT | alkaloid metabolic process                                                        | RT | 10  | 0.4 | 3.30E-03 | 1.10E-01 |
| GOTERM_BP_FAT | nicotinamide metabolic process                                                    | RT | 10  | 0.4 | 3.30E-03 | 1.10E-01 |
| GOTERM_BP_FAT | purine nucleoside metabolic process                                               | RT | 10  | 0.4 | 3.30E-03 | 1.10E-01 |
| GOTERM_BP_FAT | purine ribonucleoside metabolic process                                           | RT | 10  | 0.4 | 3.30E-03 | 1.10E-01 |
| GOTERM_BP_FAT | nicotinamide nucleotide metabolic process                                         | RT | 10  | 0.4 | 3.30E-03 | 1.10E-01 |
| GOTERM_BP_FAT | antigen processing and presentation of exogenous peptide antigen via MHC class II | RT | 8   | 0.3 | 3.50E-03 | 1.10E-01 |
| GOTERM_BP_FAT | antigen processing and presentation of peptide antigen via MHC class II           | RT | 8   | 0.3 | 3.50E-03 | 1.10E-01 |
| GOTERM_BP_FAT | apoptosis                                                                         | RT | 86  | 3.3 | 3.70E-03 | 1.20E-01 |
| GOTERM_BP_FAT | carbohydrate biosynthetic process                                                 | RT | 22  | 0.8 | 3.70E-03 | 1.20E-01 |
| GOTERM_BP_FAT | negative regulation of coagulation                                                | RT | 6   | 0.2 | 3.90E-03 | 1.20E-01 |
| GOTERM_BP_FAT | peptide metabolic process                                                         | RT | 13  | 0.5 | 3.90E-03 | 1.20E-01 |
| GOTERM_BP_FAT | coenzyme catabolic process                                                        | RT | 11  | 0.4 | 4.10E-03 | 1.30E-01 |
| GOTERM_BP_FAT | response to starvation                                                            | RT | 11  | 0.4 | 4.10E-03 | 1.30E-01 |
| GOTERM_BP_FAT | glutamine family amino acid metabolic process                                     | RT | 14  | 0.5 | 4.20E-03 | 1.30E-01 |
| GOTERM_BP_FAT | polyol metabolic process                                                          | RT | 14  | 0.5 | 4.20E-03 | 1.30E-01 |
| GOTERM_BP_FAT | 9-cis-retinoic acid biosynthetic process                                          | RT | 5   | 0.2 | 4.30E-03 | 1.30E-01 |
| GOTERM_BP_FAT | 9-cis-retinoic acid metabolic process                                             | RT | 5   | 0.2 | 4.30E-03 | 1.30E-01 |
| GOTERM_BP_FAT | vitamin A biosynthetic process                                                    | RT | 5   | 0.2 | 4.30E-03 | 1.30E-01 |
| GOTERM_BP_FAT | proteolysis                                                                       | RT | 173 | 6.6 | 4.40E-03 | 1.30E-01 |
| GOTERM_BP_FAT | cell death                                                                        | RT | 92  | 3.5 | 4.70E-03 | 1.40E-01 |
| GOTERM_BP_FAT | intracellular protein transport                                                   | RT | 55  | 2.1 | 4.70E-03 | 1.40E-01 |
| GOTERM_BP_FAT | blood vessel morphogenesis                                                        | RT | 42  | 1.6 | 4.70E-03 | 1.40E-01 |
| GOTERM_BP_FAT | hormone metabolic process                                                         | RT | 23  | 0.9 | 4.80E-03 | 1.40E-01 |
| GOTERM_BP_FAT | wound healing                                                                     | RT | 27  | 1   | 4.80E-03 | 1.40E-01 |
| GOTERM_BP_FAT | ribosome biogenesis                                                               | RT | 27  | 1   | 4.80E-03 | 1.40E-01 |
| GOTERM_BP_FAT | coenzyme biosynthetic process                                                     | RT | 18  | 0.7 | 5.10E-03 | 1.40E-01 |
| GOTERM_BP_FAT | cellular aldehyde metabolic process                                               | RT | 8   | 0.3 | 5.20E-03 | 1.50E-01 |
| GOTERM_BP_FAT | response to molecule of bacterial origin                                          | RT | 15  | 0.6 | 5.30E-03 | 1.50E-01 |
| GOTERM_BP_FAT | organophosphate metabolic process                                                 | RT | 38  | 1.4 | 5.40E-03 | 1.50E-01 |
| GOTERM_BP_FAT | cofactor biosynthetic process                                                     | RT | 23  | 0.9 | 5.50E-03 | 1.50E-01 |
| GOTERM_BP_FAT | regulation of T cell activation                                                   | RT | 26  | 1   | 5.80E-03 | 1.60E-01 |
| GOTERM_BP_FAT | programmed cell death                                                             | RT | 86  | 3.3 | 5.90E-03 | 1.60E-01 |
| GOTERM_BP_FAT | carbohydrate catabolic process                                                    | RT | 21  | 0.8 | 6.10E-03 | 1.60E-01 |
| GOTERM_BP_FAT | death                                                                             | RT | 93  | 3.5 | 6.40E-03 | 1.70E-01 |
| GOTERM_BP_FAT | positive regulation of programmed cell death                                      | RT | 50  | 1.9 | 6.60E-03 | 1.70E-01 |
| GOTERM_BP_FAT | response to endogenous stimulus                                                   | RT | 39  | 1.5 | 6.60E-03 | 1.70E-01 |
| GOTERM_BP_FAT | negative regulation of programmed cell death                                      | RT | 49  | 1.9 | 6.60E-03 | 1.70E-01 |
| GOTERM_BP_FAT | antigen processing and presentation                                               | RT | 22  | 0.8 | 6.70E-03 | 1.70E-01 |
| GOTERM_BP_FAT | response to protein stimulus                                                      | RT | 22  | 0.8 | 6.70E-03 | 1.70E-01 |
| GOTERM_BP_FAT | serine family amino acid metabolic process                                        | RT | 9   | 0.3 | 6.90E-03 | 1.80E-01 |
| GOTERM_BP_FAT | water-soluble vitamin biosynthetic process                                        | RT | 9   | 0.3 | 6.90E-03 | 1.80E-01 |
| GOTERM_BP_FAT | autophagy                                                                         | RT | 11  | 0.4 | 6.90E-03 | 1.80E-01 |
| GOTERM_BP_FAT | negative regulation of cell death                                                 | RT | 49  | 1.9 | 7.20E-03 | 1.80E-01 |
| GOTERM_BP_FAT | negative regulation of apoptosis                                                  | RT | 48  | 1.8 | 7.20E-03 | 1.80E-01 |
| GOTERM_BP_FAT | ethanolamine and derivative metabolic process                                     | RT | 8   | 0.3 | 7.50E-03 | 1.80E-01 |
| GOTERM_BP_FAT | immune response                                                                   | RT | 85  | 3.2 | 7.60E-03 | 1.80E-01 |
| GOTERM_BP_FAT | actin filament organization                                                       | RT | 16  | 0.6 | 7.60E-03 | 1.80E-01 |
| GOTERM_BP_FAT | nucleoside metabolic process                                                      | RT | 16  | 0.6 | 7.60E-03 | 1.80E-01 |
| GOTERM_BP_FAT | protein targeting                                                                 | RT | 30  | 1.1 | 7.70E-03 | 1.80E-01 |
| GOTERM_BP_FAT | 'de novo' posttranslational protein folding                                       | RT | 7   | 0.3 | 7.70E-03 | 1.80E-01 |
| GOTERM_BP_FAT | 'de novo' protein folding                                                         | RT | 7   | 0.3 | 7.70E-03 | 1.80E-01 |
| GOTERM_BP_FAT | regulation of blood coagulation                                                   | RT | 7   | 0.3 | 7.70E-03 | 1.80E-01 |
| GOTERM_BP_FAT | NADP metabolic process                                                            | RT | 7   | 0.3 | 7.70E-03 | 1.80E-01 |
| GOTERM_BP_FAT | positive regulation of cell death                                                 | RT | 50  | 1.9 | 7.70E-03 | 1.80E-01 |
| GOTERM_BP_FAT | sulfur metabolic process                                                          | RT | 23  | 0.9 | 8.20E-03 | 1.90E-01 |
| GOTERM_BP_FAT | negative regulation of multicellular organismal process                           | RT | 24  | 0.9 | 8.60E-03 | 2.00E-01 |
| GOTERM_BP_FAT | positive regulation of T cell differentiation                                     | RT | 11  | 0.4 | 8.90E-03 | 2.00E-01 |
| GOTERM_BP_FAT | antigen processing and presentation via MHC class Ib                              | RT | 5   | 0.2 | 9.00E-03 | 2.10E-01 |
| GOTERM_BP_FAT | glucose catabolic process                                                         | RT | 15  | 0.6 | 9.30E-03 | 2.10E-01 |
| GOTERM_BP_FAT | hexose catabolic process                                                          | RT | 15  | 0.6 | 9.30E-03 | 2.10E-01 |
| GOTERM_BP_FAT | vacuolar transport                                                                | RT | 9   | 0.3 | 9.30E-03 | 2.10E-01 |
| GOTERM_BP_FAT | cellular response to starvation                                                   | RT | 9   | 0.3 | 9.30E-03 | 2.10E-01 |
| GOTERM_BP_FAT | negative regulation of steroid metabolic process                                  | RT | 4   | 0.2 | 9.50E-03 | 2.10E-01 |
| GOTERM_BP_FAT | cellular response to nutrient                                                     | RT | 4   | 0.2 | 9.50E-03 | 2.10E-01 |
| GOTERM_BP_FAT | negative regulation of steroid biosynthetic process                               | RT | 4   | 0.2 | 9.50E-03 | 2.10E-01 |
| GOTERM_BP_FAT | negative regulation of catalytic activity                                         | RT | 24  | 0.9 | 9.80E-03 | 2.20E-01 |
| GOTERM_BP_FAT | DNA packaging                                                                     | RT | 24  | 0.9 | 9.80E-03 | 2.20E-01 |

**Supporting Table S4. DAVID Analysis of Gene Ontology (Cellular Components)**

| Category      | Term                                           | RT | Count | %    | P-Value  | Benjamini |
|---------------|------------------------------------------------|----|-------|------|----------|-----------|
| GOTERM_CC_FAT | endoplasmic reticulum                          | RT | 227   | 8.6  | 1.10E-24 | 6.30E-22  |
| GOTERM_CC_FAT | mitochondrion                                  | RT | 302   | 11.4 | 4.80E-20 | 1.40E-17  |
| GOTERM_CC_FAT | organelle membrane                             | RT | 206   | 7.8  | 5.30E-19 | 1.00E-16  |
| GOTERM_CC_FAT | cell fraction                                  | RT | 150   | 5.7  | 2.70E-13 | 3.80E-11  |
| GOTERM_CC_FAT | microsome                                      | RT | 63    | 2.4  | 1.10E-12 | 1.20E-10  |
| GOTERM_CC_FAT | vesicular fraction                             | RT | 64    | 2.4  | 1.70E-12 | 1.60E-10  |
| GOTERM_CC_FAT | mitochondrial part                             | RT | 129   | 4.9  | 7.60E-11 | 6.20E-09  |
| GOTERM_CC_FAT | organelle inner membrane                       | RT | 87    | 3.3  | 2.10E-10 | 1.50E-08  |
| GOTERM_CC_FAT | endoplasmic reticulum part                     | RT | 70    | 2.7  | 3.20E-10 | 2.00E-08  |
| GOTERM_CC_FAT | envelope                                       | RT | 130   | 4.9  | 4.00E-10 | 2.30E-08  |
| GOTERM_CC_FAT | organelle envelope                             | RT | 129   | 4.9  | 6.10E-10 | 3.20E-08  |
| GOTERM_CC_FAT | mitochondrial envelope                         | RT | 100   | 3.8  | 1.50E-09 | 7.30E-08  |
| GOTERM_CC_FAT | soluble fraction                               | RT | 39    | 1.5  | 1.60E-09 | 7.00E-08  |
| GOTERM_CC_FAT | mitochondrial inner membrane                   | RT | 81    | 3.1  | 2.50E-09 | 1.00E-07  |
| GOTERM_CC_FAT | mitochondrial membrane                         | RT | 94    | 3.6  | 5.40E-09 | 2.00E-07  |
| GOTERM_CC_FAT | insoluble fraction                             | RT | 121   | 4.6  | 2.90E-08 | 1.00E-06  |
| GOTERM_CC_FAT | peroxisome                                     | RT | 37    | 1.4  | 9.90E-08 | 3.30E-06  |
| GOTERM_CC_FAT | microbody                                      | RT | 37    | 1.4  | 9.90E-08 | 3.30E-06  |
| GOTERM_CC_FAT | cytosol                                        | RT | 122   | 4.6  | 1.50E-07 | 4.90E-06  |
| GOTERM_CC_FAT | membrane fraction                              | RT | 115   | 4.4  | 1.70E-07 | 5.00E-06  |
| GOTERM_CC_FAT | endomembrane system                            | RT | 116   | 4.4  | 1.20E-06 | 3.40E-05  |
| GOTERM_CC_FAT | lysosome                                       | RT | 50    | 1.9  | 1.70E-06 | 4.60E-05  |
| GOTERM_CC_FAT | lytic vacuole                                  | RT | 50    | 1.9  | 2.00E-06 | 5.30E-05  |
| GOTERM_CC_FAT | vacuole                                        | RT | 54    | 2    | 4.40E-06 | 1.10E-04  |
| GOTERM_CC_FAT | endoplasmic reticulum membrane                 | RT | 43    | 1.6  | 8.30E-06 | 2.00E-04  |
| GOTERM_CC_FAT | membrane-enclosed lumen                        | RT | 217   | 8.2  | 8.60E-06 | 2.00E-04  |
| GOTERM_CC_FAT | organelle lumen                                | RT | 209   | 7.9  | 1.80E-05 | 3.90E-04  |
| GOTERM_CC_FAT | intracellular organelle lumen                  | RT | 208   | 7.9  | 2.20E-05 | 4.50E-04  |
| GOTERM_CC_FAT | mitochondrial matrix                           | RT | 44    | 1.7  | 2.30E-05 | 4.60E-04  |
| GOTERM_CC_FAT | mitochondrial lumen                            | RT | 44    | 1.7  | 2.30E-05 | 4.60E-04  |
| GOTERM_CC_FAT | nuclear envelope-endoplasmic reticulum network | RT | 43    | 1.6  | 3.20E-05 | 6.30E-04  |
| GOTERM_CC_FAT | pigment granule                                | RT | 26    | 1    | 1.90E-04 | 3.50E-03  |
| GOTERM_CC_FAT | melanosome                                     | RT | 26    | 1    | 1.90E-04 | 3.50E-03  |
| GOTERM_CC_FAT | endoplasmic reticulum lumen                    | RT | 23    | 0.9  | 2.40E-04 | 4.50E-03  |
| GOTERM_CC_FAT | endosome                                       | RT | 57    | 2.2  | 2.70E-04 | 4.80E-03  |
| GOTERM_CC_FAT | lipid particle                                 | RT | 8     | 0.3  | 8.50E-04 | 1.50E-02  |
| GOTERM_CC_FAT | integral to organelle membrane                 | RT | 25    | 0.9  | 9.90E-04 | 1.70E-02  |
| GOTERM_CC_FAT | integral to endoplasmic reticulum membrane     | RT | 13    | 0.5  | 1.20E-03 | 1.90E-02  |
| GOTERM_CC_FAT | actin cytoskeleton                             | RT | 46    | 1.7  | 1.30E-03 | 2.10E-02  |
| GOTERM_CC_FAT | myosin complex                                 | RT | 19    | 0.7  | 1.40E-03 | 2.10E-02  |
| GOTERM_CC_FAT | intrinsic to organelle membrane                | RT | 29    | 1.1  | 1.40E-03 | 2.10E-02  |
| GOTERM_CC_FAT | intrinsic to endoplasmic reticulum membrane    | RT | 17    | 0.6  | 1.50E-03 | 2.20E-02  |
| GOTERM_CC_FAT | microbody membrane                             | RT | 11    | 0.4  | 1.80E-03 | 2.60E-02  |
| GOTERM_CC_FAT | peroxisomal membrane                           | RT | 11    | 0.4  | 1.80E-03 | 2.60E-02  |
| GOTERM_CC_FAT | peroxisomal part                               | RT | 12    | 0.5  | 2.30E-03 | 3.20E-02  |
| GOTERM_CC_FAT | microbody part                                 | RT | 12    | 0.5  | 2.30E-03 | 3.20E-02  |
| GOTERM_CC_FAT | Golgi apparatus                                | RT | 123   | 4.7  | 2.40E-03 | 3.30E-02  |
| GOTERM_CC_FAT | plasma lipoprotein particle                    | RT | 11    | 0.4  | 2.50E-03 | 3.30E-02  |
| GOTERM_CC_FAT | protein-lipid complex                          | RT | 11    | 0.4  | 2.50E-03 | 3.30E-02  |
| GOTERM_CC_FAT | sarcolemma                                     | RT | 15    | 0.6  | 4.10E-03 | 5.20E-02  |
| GOTERM_CC_FAT | extrinsic to membrane                          | RT | 88    | 3.3  | 4.20E-03 | 5.20E-02  |
| GOTERM_CC_FAT | nuclear membrane                               | RT | 13    | 0.5  | 4.50E-03 | 5.50E-02  |
| GOTERM_CC_FAT | monolayer-surrounded lipid storage body        | RT | 5     | 0.2  | 4.60E-03 | 5.50E-02  |
| GOTERM_CC_FAT | ribonucleoprotein complex                      | RT | 86    | 3.3  | 5.00E-03 | 5.70E-02  |
| GOTERM_CC_FAT | contractile fiber                              | RT | 24    | 0.9  | 5.60E-03 | 6.30E-02  |
| GOTERM_CC_FAT | late endosome                                  | RT | 14    | 0.5  | 6.00E-03 | 6.60E-02  |
| GOTERM_CC_FAT | nuclear periphery                              | RT | 15    | 0.6  | 6.20E-03 | 6.70E-02  |
| GOTERM_CC_FAT | sarcomere                                      | RT | 21    | 0.8  | 6.40E-03 | 6.80E-02  |
| GOTERM_CC_FAT | contractile fiber part                         | RT | 22    | 0.8  | 7.10E-03 | 7.40E-02  |
| GOTERM_CC_FAT | vesicle                                        | RT | 94    | 3.6  | 7.30E-03 | 7.40E-02  |
| GOTERM_CC_FAT | membrane-bounded vesicle                       | RT | 78    | 3    | 7.80E-03 | 7.80E-02  |
| GOTERM_CC_FAT | extracellular space                            | RT | 92    | 3.5  | 9.20E-03 | 9.00E-02  |

**Supporting Table S5. DAVID Analysis of KEGG Pathways**

| Category     | Term                                         | RT | Count | %   | P-Value  | Benjamini |
|--------------|----------------------------------------------|----|-------|-----|----------|-----------|
| KEGG_PATHWAY | Drug metabolism                              | RT | 42    | 1.6 | 1.40E-13 | 2.70E-11  |
| KEGG_PATHWAY | Metabolism of xenobiotics by cytochrome P450 | RT | 36    | 1.4 | 2.90E-11 | 2.70E-09  |

|              |                                             |    |    |     |          |          |
|--------------|---------------------------------------------|----|----|-----|----------|----------|
| KEGG_PATHWAY | Retinol metabolism                          | RT | 34 | 1.3 | 2.20E-09 | 1.40E-07 |
| KEGG_PATHWAY | Glutathione metabolism                      | RT | 24 | 0.9 | 4.60E-06 | 2.20E-04 |
| KEGG_PATHWAY | Glycine, serine and threonine metabolism    | RT | 17 | 0.6 | 2.00E-05 | 7.60E-04 |
| KEGG_PATHWAY | Complement and coagulation cascades         | RT | 29 | 1.1 | 2.30E-05 | 7.20E-04 |
| KEGG_PATHWAY | PPAR signaling pathway                      | RT | 28 | 1.1 | 1.90E-04 | 5.00E-03 |
| KEGG_PATHWAY | Fatty acid metabolism                       | RT | 19 | 0.7 | 2.40E-04 | 5.70E-03 |
| KEGG_PATHWAY | Steroid hormone biosynthesis                | RT | 17 | 0.6 | 2.30E-03 | 4.80E-02 |
| KEGG_PATHWAY | Glyoxylate and dicarboxylate metabolism     | RT | 9  | 0.3 | 2.60E-03 | 4.80E-02 |
| KEGG_PATHWAY | Synthesis and degradation of ketone bodies  | RT | 7  | 0.3 | 2.90E-03 | 4.80E-02 |
| KEGG_PATHWAY | Valine, leucine and isoleucine degradation  | RT | 17 | 0.6 | 3.00E-03 | 4.70E-02 |
| KEGG_PATHWAY | Prostate cancer                             | RT | 27 | 1   | 3.90E-03 | 5.60E-02 |
| KEGG_PATHWAY | Steroid biosynthesis                        | RT | 9  | 0.3 | 4.20E-03 | 5.50E-02 |
| KEGG_PATHWAY | Amino sugar and nucleotide sugar metabolism | RT | 16 | 0.6 | 5.00E-03 | 6.20E-02 |
| KEGG_PATHWAY | Lysosome                                    | RT | 33 | 1.2 | 5.00E-03 | 5.80E-02 |
| KEGG_PATHWAY | Arginine and proline metabolism             | RT | 18 | 0.7 | 5.90E-03 | 6.40E-02 |
| KEGG_PATHWAY | Hypertrophic cardiomyopathy (HCM)           | RT | 25 | 0.9 | 6.40E-03 | 6.50E-02 |
| KEGG_PATHWAY | Systemic lupus erythematosus                | RT | 29 | 1.1 | 7.20E-03 | 6.90E-02 |
| KEGG_PATHWAY | Primary bile acid biosynthesis              | RT | 8  | 0.3 | 7.90E-03 | 7.20E-02 |
